# Supplementary material for: Deciphering Molecular Determinants Underlying Penicillium digitatum’s Response to Biological and Chemical Antifungal Agents by Tandem Mass Tag (TMT)-Based High-Resolution LC-MS/MS
Source: MDPI journal article supplement (doi:10.3390/ijms23020680), 2022-01-08

## Supplementary Material

### **Deciphering molecular determinants underlying *Penicillium digitatum* response to biological and chemical antifungal agents by Tandem Mass Tag (TMT)-based high-resolution LC-MS/MS**

Lucía Citores<sup>1‡</sup>, Mariangela Valletta<sup>2‡</sup>, Vikram Pratap Singh<sup>2</sup>, Paolo Vincenzo Pedone<sup>2</sup>, Rosario Iglesias<sup>1</sup>, José M. Ferreras<sup>1</sup>, Angela Chambery<sup>§2\*</sup>, Rosita Russo<sup>§2\*</sup>

<sup>1</sup>Department of Department of Biochemistry and Molecular Biology and Physiology, Faculty of Sciences, University of Valladolid, E-47011 Valladolid, Spain; lucia.citores@uva.es (L.C.); riglesia@bio.uva.es (R.I.); josemiguel.ferreras@uva.es (J.M.F.)

<sup>2</sup>Department of Environmental, Biological and Pharmaceutical Sciences and Technologies, University of Campania Luigi Vanvitelli, Caserta, Italy; mariangela.valletta@unicampania.it (M.V.); vikrampratap.singh@unicampania.it (V.P.S.); paolovincenzo.pedone@unicampania.it (P.V.P.); angela.chambery@unicampania.it (A.C.); rosita.russo@unicampania.it (R.R.)

\*Correspondence: angela.chambery@unicampania.it; Tel.: +39 (0)823 274583; rosita.russo@unicampania.it; Tel.: +39 (0)823 274535;

‡ These authors share equal first authorship

§ These authors share equal senior authorship

**Figure S1.** Bar charts reporting the counts of peptide groups abundances versus CV% values for  $\alpha$ -sarcin-, BE27- and TBZ - treated and untreated (CTR) *P. digitatum* samples.

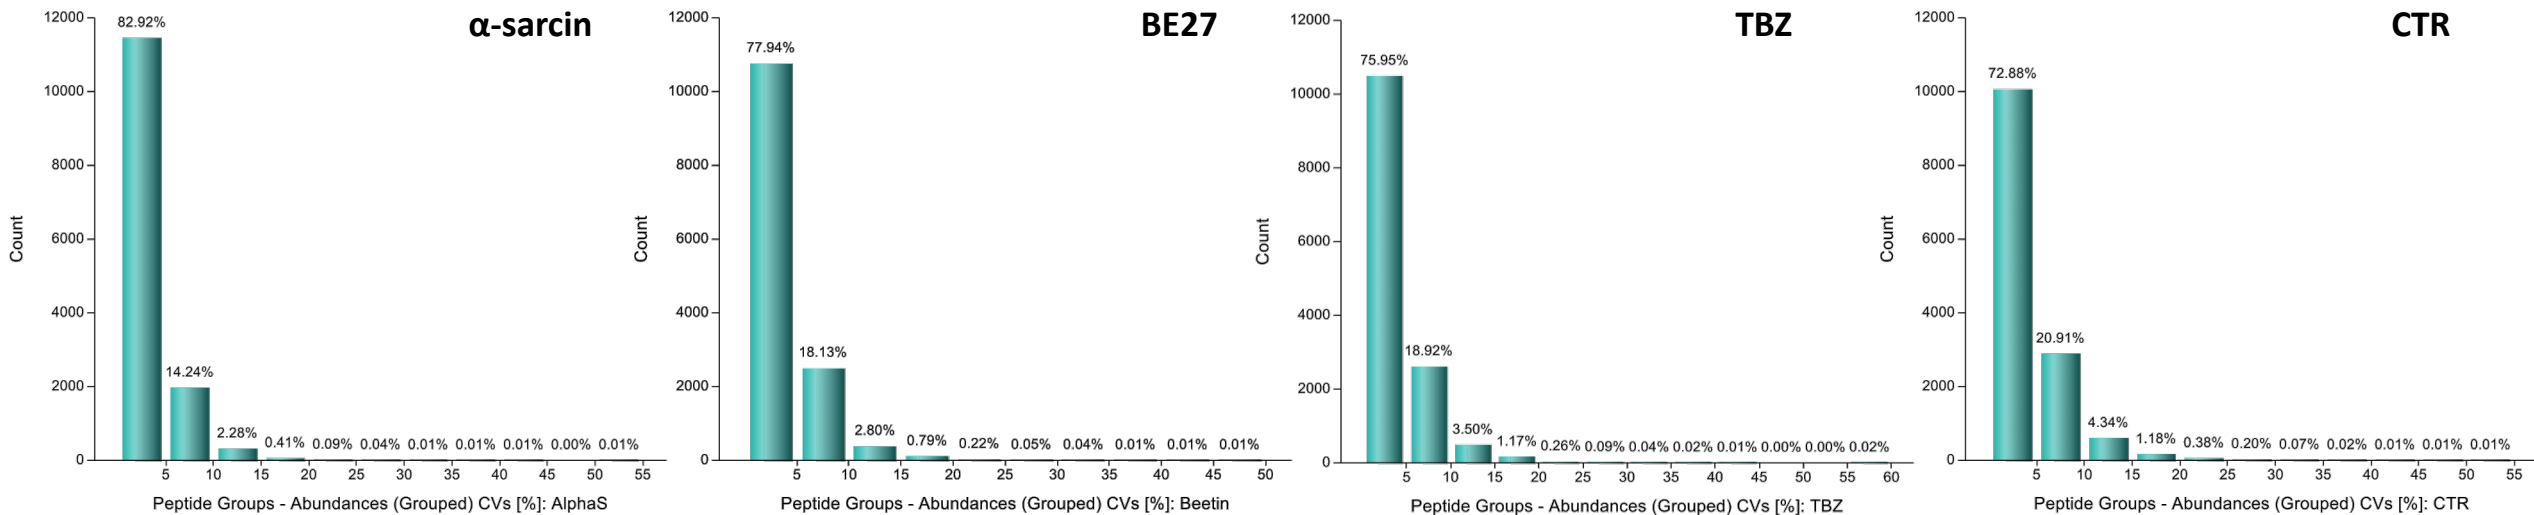

**Figure S2.** Volcano plots obtained from TMT-based quantitative proteomics analysis showing  $-\text{Log}_{10}$  p-values versus  $\text{Log}_2$  fold-change values of TBZ, BE27 and  $\alpha$ -sarcin treatments in *P. digitatum* with respect to control (CTR). Plots are referred to unfiltered datasets. Identified proteins with no changes in their regulation levels are reported in grey. Up- and down-regulated proteins (fold change  $\geq 1.5$ ) are indicated in red and green, respectively.

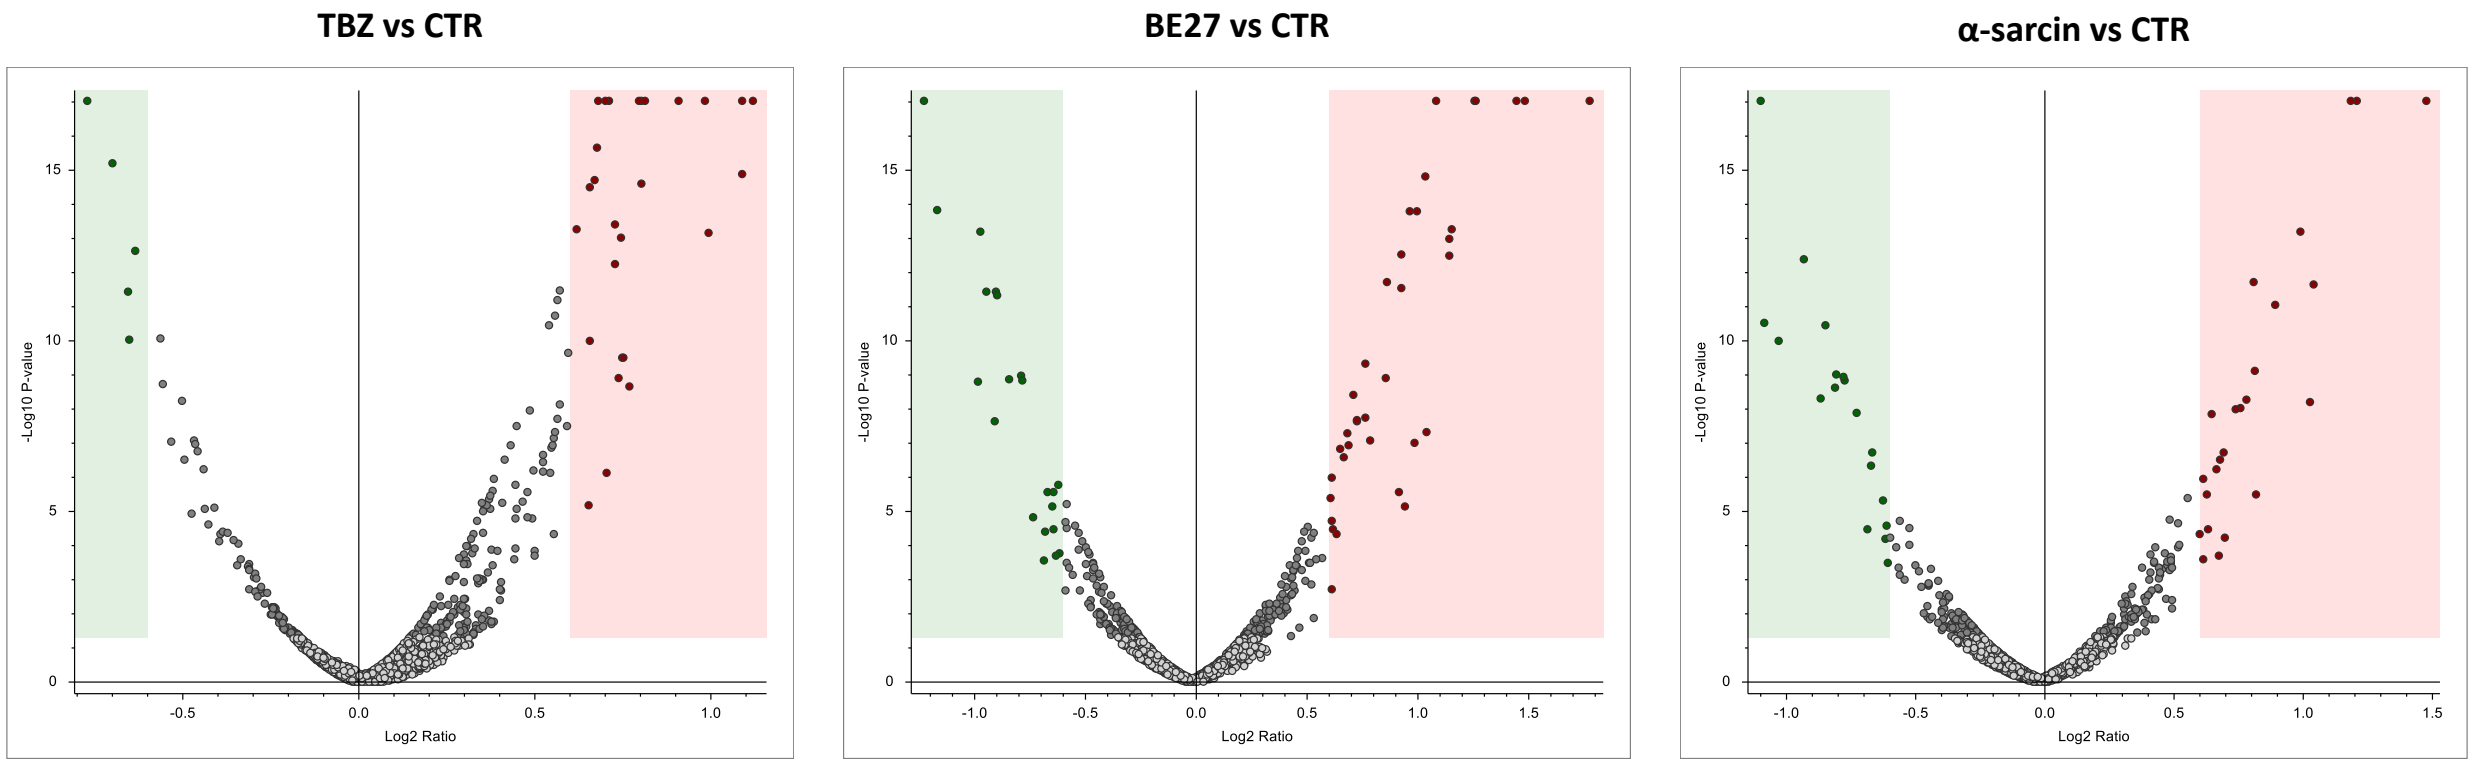

Supplement: s1 [file s1]
